# Supplementary material
Source: PubMed Central journal article supplement (PMC6108846)
Supplement: EHP3441.s001.acco.pdf [file EHP3441.s001.acco.pdf]

**Note to readers with disabilities:** *EHP* strives to ensure that all journal content is accessible to all readers. However, some figures and Supplemental Material published in *EHP* articles may not conform to [508 standards](#) due to the complexity of the information being presented. If you need assistance accessing journal content, please contact [ehp508@niehs.nih.gov](mailto:ehp508@niehs.nih.gov). Our staff will work with you to assess and meet your accessibility needs within 3 working days.

### **Supplemental Material**

#### **Longitudinal Effects of Developmental Bisphenol A Exposure on Epigenome-Wide DNA Hydroxymethylation at Imprinted Loci in Mouse Blood**

Joseph J. Kochmanski, Elizabeth H. Marchlewicz, Raymond G. Cavalcante, Bambarendage P. U. Perera, Maureen A. Sartor, and Dana C. Dolinoy

#### **Table of Contents**

**Table S1.** Real-time quantitative polymerase chain reaction (RT-qPCR) primers for self-designed gene assays.

**Table S2.** Enhanced reduced representation bisulfite sequencing (ERRBS) differentially methylated CpGs (DMCs) annotated to top hit imprinted genes.

**Table S3.** Number of cytosine-phosphate-guanine (CpG) and cytosine-H-guanine (CHG; where H = adenine or thymine) sites at imprinted gene differentially hydroxymethylated regions (DHMRs).

**Table S4.** Enriched bisphenol A (BPA)-related differentially hydroxymethylated region (DHMR) pathways.

**Figure S1. Exposure paradigm and blood collection time points to measure longitudinal 5-hydroxymethylcytosine (5-hmC) patterns.** Two weeks prior to mate-pairing with  $A^{y}/a$  males, six week old wild type  $a/a$  dams were placed on one of two experimental diet groups: (1) Control (modified AIN-93G), (2) Control + 50  $\mu$ g bisphenol A (BPA)/kg diet. Exposure continued through pregnancy and lactation, ending for offspring at postnatal day (PND) 21. Matched blood samples were collected from wildtype  $a/a$  offspring at 2 months, 4 months, and 10 months of age.

**Figure S2. Distribution of bisphenol A (BPA)-related differentially hydroxymethylated regions (DHMRs) compared to random.** Using the *annotatr* R package, BPA-related DHMRs were annotated to the *mm10* genome. Compared to a random distribution generated from background hydroxymethylated DNA immunoprecipitation-sequencing (HMeDIP-seq) data, BPA-related DHMRs were depleted at CpG shores, CpG shelves, promoters, 3'-UTRs, 5'-UTRs, exons, and introns, but slightly enriched at regions greater than 4,000 base pairs (bp) from a CpG island (interCGI). 3'-UTRs = 3'-untranslated regions. 5'-UTRs = 5'-untranslated regions. CpG = cytosine-phosphate-guanine.

**Figure S3. Enhanced reduced representation bisulfite sequencing (ERRBS) DNA methylation data from identified *Klf14* differentially hydroxymethylated region (DHMR).** Using the *RnBeads* R package, ERRBS data was visualized for the CpG sites contained within the identified *Klf14* DHMR. DNA methylation level is represented by intensity of color, with zero % methylation represented by white and 100% methylation represented by dark red. ERRBS data from Control mice is shown on the left, while ERRBS data from BPA exposed mice is shown on the right. Blood sample collection age (2 months, 4 months, or 10 months old) is indicated in the left column. Mean methylation across all CpGs with data is represented by line plots below the raw data. Line plots are colored according to age group. At the *Klf14* DHMR, there were no significant differentially methylated CpGs by BPA exposure, although comparisons were difficult due to limited coverage at some CpG.

**Figure S4. Additional differential imprinted gene 5-hydroxymethylcytosine (5-hmC) peaks by bisphenol A (BPA) exposure.** 5-hmC coverage was visualized at six additional imprinted loci with significant BPA-related differentially hydroxymethylated regions (DHMRs): A) *Airn*, B) *Cmah*, C) *Ppp1r9a*, D) *Kcnq1*, E) *Phactr2*, and F) *Pde4d*. 5-hmC levels are shown for matched 2 month, 4 month, and 10 month blood samples, as indicated by y-axis labels. Blue and red peaks represent forward and reverse strand 5-hmC enrichment, respectively. *Cmah*, *Ppp1r9a*, and *Kcnq1* DHMRs occurred on the forward strand. *Airn*, *Phactr2*, and *Pde4d* DHMRs occurred on the reverse strand.

**Figure S5. 5-hydroxymethylcytosine (5-hmC) peaks at the *Igf2/H19* imprinted loci.** Based on results at the *Plagl1* locus, which is a regulator of *Igf2* and *H19*, longitudinal 5-hmC patterns across the *Igf2* and *H19* imprinted genes were also visualized. 5-hmC peaks at both loci appear stable across individuals and adulthood stage in longitudinal mouse blood (2, 4, and 10 months old). Regions of non-significant bisphenol A (BPA)-related differential 5-hmC are indicated in red boxes for both genes. Despite not being detected as significant differentially hydroxymethylated regions (DHMRs) in *csaw*, these bisphenol A (BPA)-related changes in 5-hmC were stable at all three measured time points.

**Table S1. Real-time quantitative polymerase chain reaction (RT-qPCR) primers for self-designed gene assays.**

| Gene         | Full Name                                                                  | GenBank Number | Strand | Primers (5' to 3')   | T <sub>m</sub> (°C) | Amplicon Size |
|--------------|----------------------------------------------------------------------------|----------------|--------|----------------------|---------------------|---------------|
| <i>Gapdh</i> | Glyceraldehyde 3-phosphate dehydrogenase                                   | NM_008084.3    | FWD    | GCCTGCTTCACCACCTTCTT | 59.96               | 98            |
|              |                                                                            |                | RVS    | CATGGCCTTCCGTGTTCTTA | 59.07               |               |
| <i>Gnas</i>  | GNAS (guanine nucleotide binding protein, alpha stimulating) complex locus | NM_201618.2    | FWD    | CTGCCATCATCTTCGTGGTG | 58.99               | 193           |
|              |                                                                            |                | RVS    | GATTGCCAGCGAGGACTTT  | 58.83               |               |

Forward and reverse primer sequences for the *Gapdh* and *Gnas* RT-qPCR assays are listed, along with melting temperatures and amplicon size. All assays were designed using the online Genscript Real-time PCR Primer Design software (<https://www.genscript.com/tools/real-time-pcr-tagman-primer-design-tool>). FWD = forward. RVS = reverse. T<sub>m</sub> = melting temperature.

**Table S2 – Enhanced reduced representation bisulfite sequencing (ERRBS) differentially methylated CpGs (DMCs) annotated to top hit imprinted genes.**

| BPA-related <i>Gnas/Nespas</i> DMCs |           |                |                         |         |               |
|-------------------------------------|-----------|----------------|-------------------------|---------|---------------|
| Chr                                 | Position  | Location       | $\Delta$ % Methylation† | Gene ID | Gene name     |
| chr2                                | 174295388 | 1to5kb:6242    | -17.1%                  | 14683   | <i>Gnas</i>   |
| chr2                                | 174295403 | 1to5kb:6241    | -87.2%                  | 14683   | <i>Gnas</i>   |
| chr2                                | 174299808 | exon:51698     | -10.6%                  | 14683   | <i>Gnas</i>   |
| chr2                                | 174305903 | intron:45418   | 23.1%                   | 14683   | <i>Gnas</i>   |
| chr2                                | 174329842 | 5UTR:7653      | -7.7%                   | 14683   | <i>Gnas</i>   |
| chr2                                | 174330525 | intron:45422   | -12.7%                  | 14683   | <i>Gnas</i>   |
| chr2                                | 174330995 | intron:45434   | 9.9%                    | 14683   | <i>Gnas</i>   |
| chr2                                | 174335278 | intron:45423   | 29.8%                   | 14683   | <i>Gnas</i>   |
| chr2                                | 174284270 | intron:64744   | -20.8%                  | 56802   | <i>Nespas</i> |
| chr2                                | 174284281 | intron:64744   | -35.9%                  | 56802   | <i>Nespas</i> |
| chr2                                | 174284283 | intron:64740   | -14.1%                  | 56802   | <i>Nespas</i> |
| chr2                                | 174291169 | intron:64746   | 26.3%                   | 56802   | <i>Nespas</i> |
| BPA-related <i>Grb10</i> DMCs       |           |                |                         |         |               |
| Chr                                 | Position  | Location       | $\Delta$ % Methylation† | Gene ID | Gene name     |
| chr11                               | 11967584  | exon:321631    | 20.7%                   | 14783   | <i>Grb10</i>  |
| chr11                               | 12037132  | intron:281448  | 44.8%                   | 14783   | <i>Grb10</i>  |
| BPA-related <i>Plagl1</i> DMCs      |           |                |                         |         |               |
| Chr                                 | Position  | Location       | $\Delta$ % Methylation† | Gene ID | Gene name     |
| chr10                               | 13060418  | promoter:34649 | 12.9%                   | 22634   | <i>Plagl1</i> |
| chr10                               | 13077185  | intron:242831  | 25.8%                   | 22634   | <i>Plagl1</i> |
| chr10                               | 13080633  | intron:242831  | 19.4%                   | 22634   | <i>Plagl1</i> |
| chr10                               | 13090048  | promoter:34650 | 37.0%                   | 22634   | <i>Plagl1</i> |
| chr10                               | 13127241  | exon:277501    | -6.4%                   | 22634   | <i>Plagl1</i> |
| BPA-related <i>Klf14/Mest</i> DMCs  |           |                |                         |         |               |
| Chr                                 | Position  | Location       | $\Delta$ % Methylation† | Gene ID | Gene name     |
| chr6                                | 30732802  | promoter:19692 | 47.6%                   | 17294   | <i>Mest</i>   |
| chr6                                | 30742815  | exon:163519    | -7.1%                   | 17294   | <i>Mest</i>   |
| BPA-related <i>Pde10a</i> DMCs      |           |                |                         |         |               |
| Chr                                 | Position  | Location       | $\Delta$ % Methylation† | Gene ID | Gene name     |
| chr17                               | 8541336   | intron:376679  | 20.4%                   | 23984   | <i>Pde10a</i> |
| chr17                               | 8550528   | intron:376679  | 35.3%                   | 23984   | <i>Pde10a</i> |
| chr17                               | 8551487   | intron:376679  | 71.0%                   | 23984   | <i>Pde10a</i> |
| chr17                               | 8556028   | intron:376679  | 25.3%                   | 23984   | <i>Pde10a</i> |
| chr17                               | 8569240   | intron:376679  | 19.3%                   | 23984   | <i>Pde10a</i> |
| chr17                               | 8580177   | intron:376679  | 22.8%                   | 23984   | <i>Pde10a</i> |
| chr17                               | 8612493   | intron:376679  | 20.9%                   | 23984   | <i>Pde10a</i> |
| chr17                               | 8613629   | intron:376679  | -12.5%                  | 23984   | <i>Pde10a</i> |
| chr17                               | 8724732   | intron:376679  | 31.9%                   | 23984   | <i>Pde10a</i> |

| chr17                         | 8831508  | intron:376680 | 30.6%                   | 23984   | <i>Pde10a</i> |
|-------------------------------|----------|---------------|-------------------------|---------|---------------|
| chr17                         | 8875353  | intron:376723 | 7.6%                    | 23984   | <i>Pde10a</i> |
| chr17                         | 8880832  | intron:376723 | 24.3%                   | 23984   | <i>Pde10a</i> |
| chr17                         | 8955545  | intron:376734 | 11.5%                   | 23984   | <i>Pde10a</i> |
| chr17                         | 8969673  | exon:430628   | 6.3%                    | 23984   | <i>Pde10a</i> |
| chr17                         | 8972335  | intron:376739 | 36.0%                   | 23984   | <i>Pde10a</i> |
| BPA-related <i>Snrpn</i> DMCs |          |               |                         |         |               |
| Chr                           | Position | Location      | $\Delta$ % Methylation† | Gene ID | Gene name     |
| chr7                          | 60155536 | intron:186662 | -6.4%                   | 20646   | <i>Snrpn</i>  |
| chr7                          | 60289904 | intron:186663 | -12.3%                  | 20646   | <i>Snrpn</i>  |
| chr7                          | 60289948 | intron:186663 | 25.2%                   | 20646   | <i>Snrpn</i>  |
| chr7                          | 60439916 | intron:186665 | 19.5%                   | 20646   | <i>Snrpn</i>  |

†Change in average % methylation from control to BPA samples

In our differential methylation analyses of the ERRBS data by bisphenol A (BPA) exposure, we identified a number of differentially methylated CpGs annotated to each of the top six imprinted loci that had differentially hydroxymethylated regions (DHMRs). All significant DMCs annotated to the six imprinted genes with visualized DHMRs are listed in the table. Each gene is split into a sub-table. Of note, we identified three CpG sites within the *Gnasxl/Nespas* ICR that demonstrated significant hypomethylation with BPA exposure. None of the identified DMCs at the other top imprinted genes – *Grb10*, *Plagl1*, *Pde10a*, *Klf14*, and *Snrpn* – fell in known murine imprinting control regions (ICRs). **BOLD** = Located in *Nespas/Gnasxl* domain ICR (Coombes et al. 2003; Williamson et al. 2006). Chr = chromosome number.

**Table S3 – Number of cytosine-phosphate-guanine (CpG) and cytosine-H-guanine (CHG; where H = adenine or thymine) sites at imprinted gene differentially hydroxymethylated regions (DHMRs).**

| <b>Gene Name</b> | <b>Location</b> | <b>Chr</b> | <b>Start</b> | <b>End</b> | <b>CpG Sites</b> | <b>CHG Sites</b> |
|------------------|-----------------|------------|--------------|------------|------------------|------------------|
| <i>Gnas</i>      | intronic        | chr2       | 174315451    | 174315750  | 0                | 21               |
| <i>Grb10</i>     | intronic        | chr11      | 12004801     | 12005100   | 0                | 13               |
| <i>Plagl1</i>    | exonic          | chr10      | 13130651     | 13131050   | 0                | 17               |
| <i>Klf14</i>     | exonic          | chr6       | 30957751     | 30958050   | 23               | 11               |
| <i>Pde10a</i>    | intronic        | chr17      | 8746901      | 8747050    | 1                | 10               |
| <i>Airn</i>      | intronic        | chr17      | 12828001     | 12828550   | 4                | 25               |
| <i>Cmah</i>      | intronic        | chr13      | 24335001     | 24335150   | 0                | 3                |
| <i>Snrpn</i>     | intronic        | chr7       | 60207401     | 60207600   | 0                | 0                |
| <i>Ppp1r9a</i>   | intronic        | chr6       | 5079501      | 5079850    | 1                | 31               |
| <i>Kcnq1</i>     | intronic        | chr7       | 143348051    | 143348350  | 5                | 13               |
| <i>Phactr2</i>   | intronic        | chr10      | 13402051     | 13402250   | 1                | 1                |
| <i>Pde4d</i>     | intronic        | chr13      | 108963951    | 108964200  | 1                | 5                |

The number of CpG and CHG sites contained within the twelve bisphenol A (BPA)-related imprinted gene DHMRs were quantified using the mm10 reference genome (<https://www.ncbi.nlm.nih.gov/nucleotide>). The number of CpG sites varied by region, with five of the DHMRs showing zero CpG sites. Chr = chromosome number.

**Table S4 - Enriched bisphenol A (BPA)-related differentially hydroxymethylated region (DHMR) pathways.**

| <b>Hypo-hydroxymethylated BPA-related DHMR Pathways</b>  |                                                                                                       |            |                                                 |
|----------------------------------------------------------|-------------------------------------------------------------------------------------------------------|------------|-------------------------------------------------|
| <b>Pathway Type</b>                                      | <b>Description</b>                                                                                    | <b>FDR</b> | <b>Genes</b>                                    |
| Gene Ontology<br>Biological Process                      | hippocampus development                                                                               | 0.007896   | 12568,<br>12570,<br>19280,<br>22062,<br>22416   |
| Gene Ontology<br>Biological Process                      | spinal cord association neuron differentiation                                                        | 0.013765   | 18505,<br>21349,<br>22416                       |
| <b>Hyper-hydroxymethylated BPA-related DHMR Pathways</b> |                                                                                                       |            |                                                 |
| <b>Pathway Type</b>                                      | <b>Description</b>                                                                                    | <b>FDR</b> | <b>Gene IDs</b>                                 |
| Gene Ontology<br>Molecular<br>Function                   | L-ascorbic acid binding                                                                               | 0.006355   | 18484,<br>320452                                |
| Gene Ontology<br>Molecular<br>Function                   | oxidoreductase activity, acting on paired donors, with incorporation or reduction of molecular oxygen | 0.006355   | 13105,<br>18484,<br>232174,<br>320452,<br>60527 |
| Gene Ontology<br>Cellular<br>Component                   | nucleolar part                                                                                        | 0.02366    | 12578,<br>68147                                 |
| Gene Ontology<br>Biological Process                      | positive regulation of establishment of protein localization to plasma membrane                       | 0.028313   | 56212,<br>76686                                 |
| Gene Ontology<br>Molecular<br>Function                   | isoprenoid binding                                                                                    | 0.041794   | 225467,<br>232174                               |

Pathway analysis for DHMRs was performed using the ChIP-enrich analysis tool (<http://chip-enrich.med.umich.edu/>). Within the ChIP-enrich tool, the gene set filter was set to 2000, peak threshold was set to 1, and adjustment for mappability of gene locus regions was set to false. The genome used for pathway analyses was mm10, and the ChIP-enrich method was used for enrichment testing. DHMRs were split into hypo- and hyper-methylated regions prior to separate analyses. Only regions <5kb from transcription start site (TSS) were included in ChIP-enrich analysis. All pathway analyses included gene ontology (GO) terms and Kyoto Encyclopedia of Genes and Genome (KEGG) pathways. After correcting for multiple testing, only pathways with false discovery rate (FDR) <0.05 were considered significant. Significant pathways for hypo- and hyper-methylated DHMRs are listed in separate tables; there was no overlap between significant pathways for these separate analyses. None of the significant pathways included any imprinted genes.

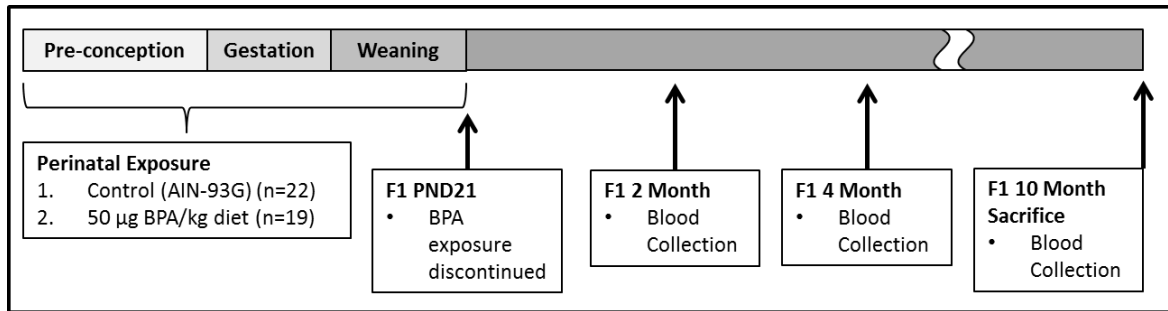

**Figure S1. Exposure paradigm and blood collection time points to measure longitudinal 5-hydroxymethylcytosine (5-hmC) patterns.** Two weeks prior to mate-pairing with  $A^{vy}/a$  males, six week old wild type  $a/a$  dams were placed on one of two experimental diet groups: (1) Control (modified AIN-93G), (2) Control + 50 µg bisphenol A (BPA)/kg diet. Exposure continued through pregnancy and lactation, ending for offspring at postnatal day (PND) 21. Matched blood samples were collected from wildtype  $a/a$  offspring at 2 months, 4 months, and 10 months of age.



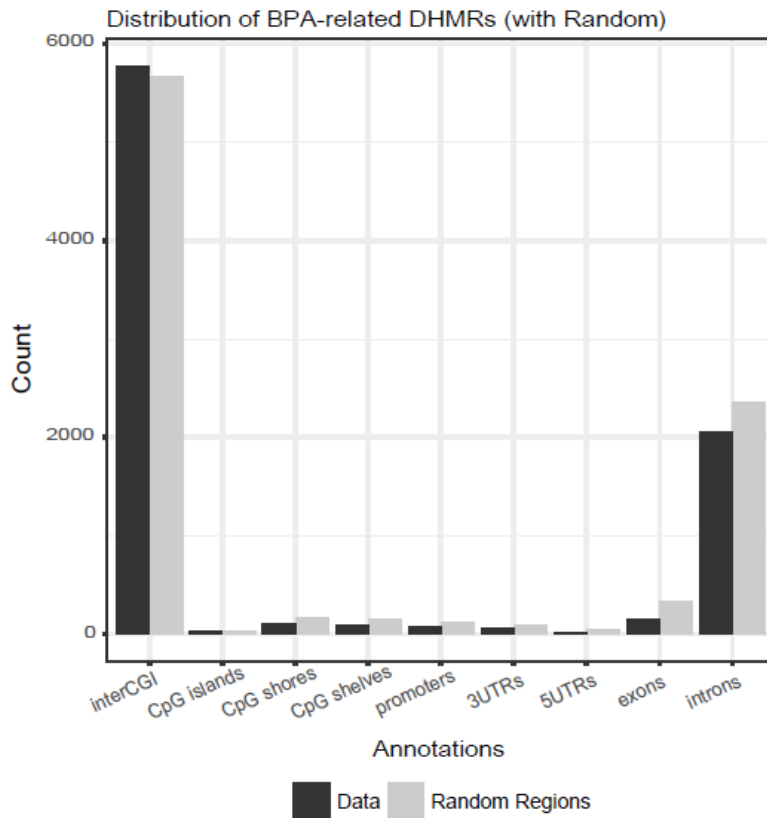

**Figure S2 – Distribution of bisphenol A (BPA)-related differentially hydroxymethylated regions (DHMRs) compared to random.** Using the *annotatr* R package, BPA-related DHMRs were annotated to the *mm10* genome. Compared to a random distribution generated from background hydroxymethylated DNA immunoprecipitation-sequencing (HMeDIP-seq) data, BPA-related DHMRs were depleted at CpG shores, CpG shelves, promoters, 3'-UTRs, 5'-UTRs, exons, and introns, but slightly enriched at regions greater than 4,000 base pairs (bp) from a CpG island (interCGI). 3'-UTRs = 3'-untranslated regions. 5'-UTRs = 5'-untranslated regions. CpG = cytosine-phosphate-guanine.

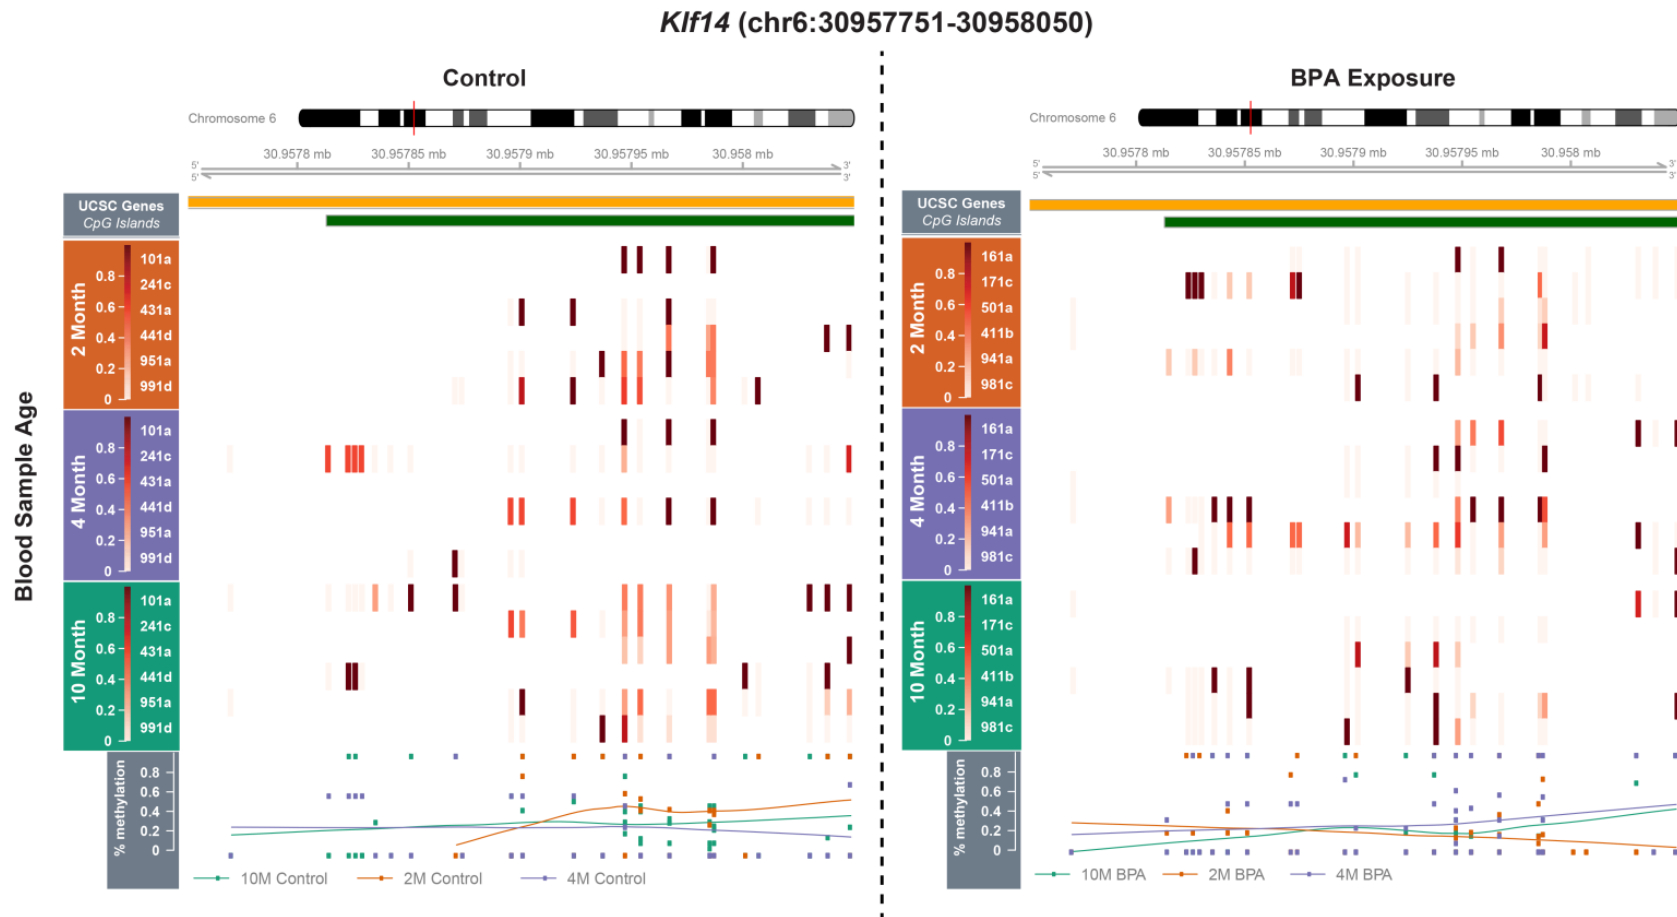

**Figure S3 – Enhanced reduced representation bisulfite sequencing (ERRBS) DNA methylation data from identified *Klf14* differentially hydroxymethylated region (DHMR).** Using the *RnBeads* R package, ERRBS data was visualized for the CpG sites contained within the identified *Klf14* DHMR. DNA methylation level is represented by intensity of color, with zero % methylation represented by white and 100% methylation represented by dark red. ERRBS data from Control mice is shown on the left, while ERRBS data from BPA exposed mice is shown on the right. Blood sample collection age (2 months, 4 months, or 10 months old) is indicated in the left column. Mean methylation across all CpGs with data is represented by line plots below the raw data. Line plots are colored according to age group. At the *Klf14* DHMR, there were no significant differentially methylated CpGs by BPA exposure, although comparisons were difficult due to limited coverage at some CpG

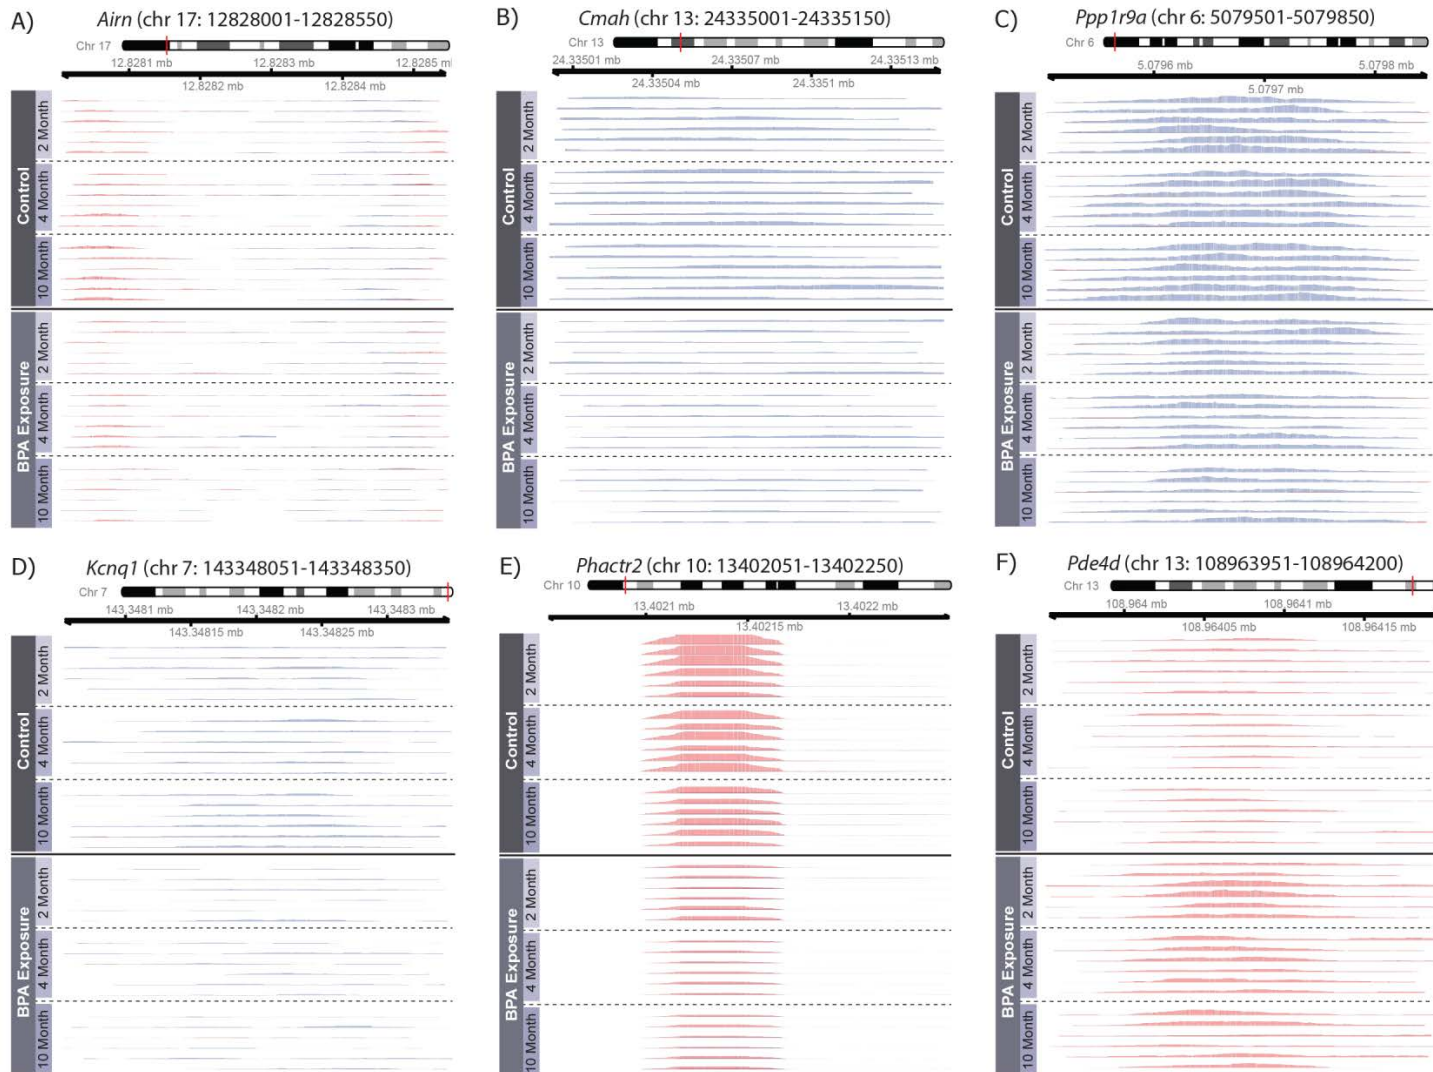

**Figure S4 – Additional differential imprinted gene 5-hydroxymethylcytosine (5-hmC) peaks by bisphenol A (BPA) exposure.** 5-hmC coverage was visualized at six additional imprinted loci with significant BPA-related differentially hydroxymethylated regions (DHMRs): A) *Airn*, B) *Cmah*, C) *Ppp1r9a*, D) *Kcnq1*, E) *Phactr2*, and F) *Pde4d*. 5-hmC levels are shown for matched 2 month, 4 month, and 10 month blood samples, as indicated by y-axis labels. Blue and red peaks represent forward and reverse strand 5-hmC enrichment, respectively. *Cmah*, *Ppp1r9a*, and *Kcnq1* DHMRs occurred on the forward strand. *Airn*, *Phactr2*, and *Pde4d* DHMRs occurred on the reverse strand.

*Igf2* (chr7:142650768-142658804)

*H19* (chr7:142575530-142578146)

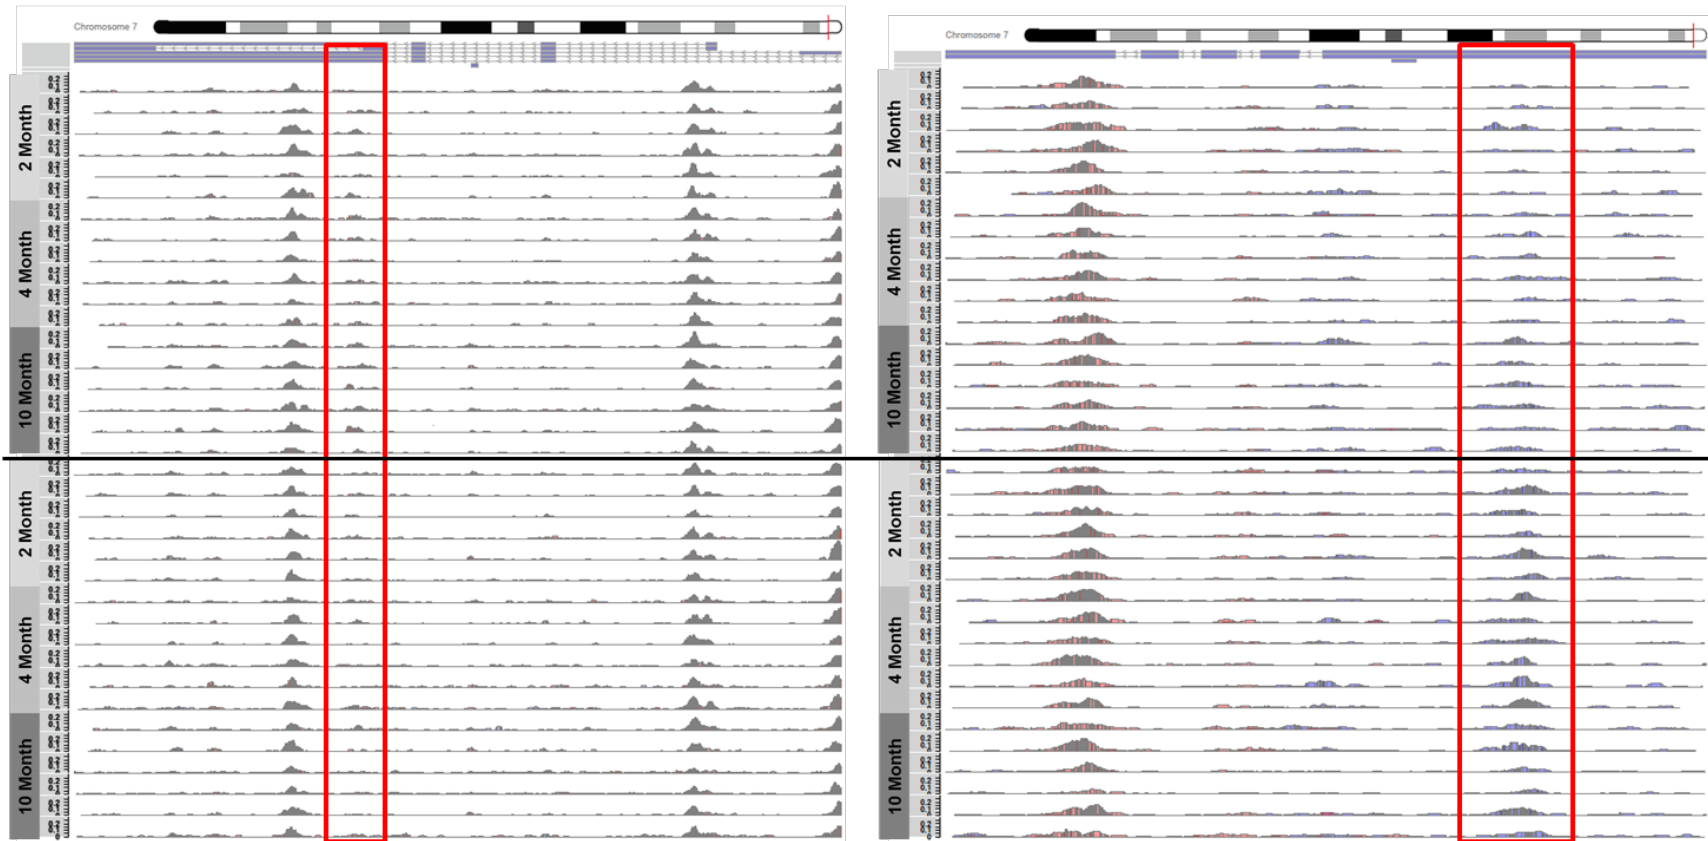

**Figure S5 – 5-hydroxymethylcytosine (5-hmC) peaks at the *Igf2*/*H19* imprinted loci.** Based on results at the *Plagl1* locus, which is a regulator of *Igf2* and *H19*, longitudinal 5-hmC patterns across the *Igf2* and *H19* imprinted genes were also visualized. 5-hmC peaks at both loci appear stable across individuals and adulthood stage in longitudinal mouse blood (2, 4, and 10 months old). Regions of non-significant bisphenol A (BPA)-related differential 5-hmC are indicated in red boxes for both genes. Despite not being detected as significant differentially hydroxymethylated regions (DHMRs) in *csaw*, these bisphenol A (BPA)-related changes in 5-hmC were stable at all three measured time points.
